# Supplementary material for: Systemic Analysis of Gene Expression Profiles Identifies ErbB3 as a Potential Drug Target in Pediatric Alveolar Rhabdomyosarcoma
Source: PubMed Central journal article supplement (PMC3515522; doi:10.1371/journal.pone.0050819), 2012-12-05

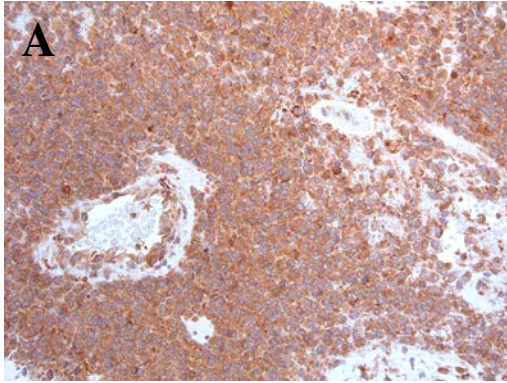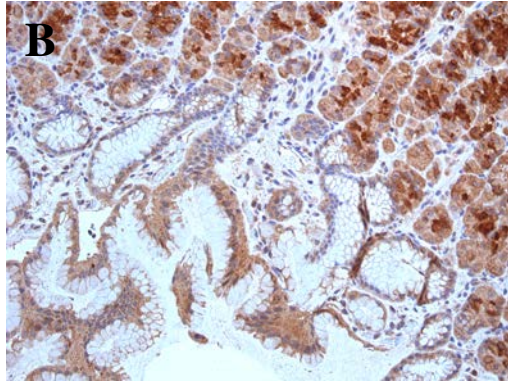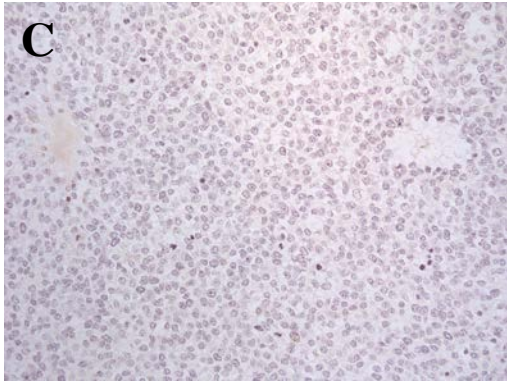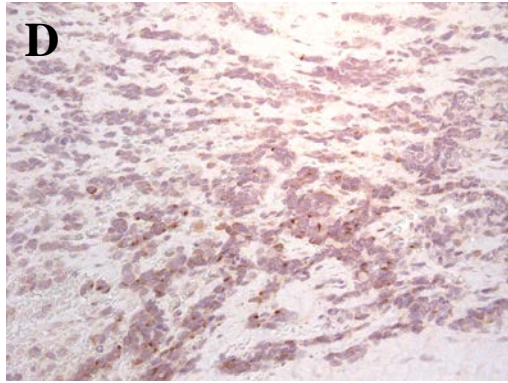

Supplement: pone.0050819.s001.pdf [file pone.0050819.s001.pdf]
